# Supplementary material for: Diversity and Distribution of Archaea in the Mangrove Sediment of Sundarbans
Source: Archaea. 2015 Aug 6;2015:968582. doi: 10.1155/2015/968582 (PMC4543378; doi:10.1155/2015/968582)
Supplement: Supplementary file 1 — Supplementary Figure 1: A phylogenetic tree was constructed with the assigned archaeal 16S rRNA sequences found in this study using MEGAN5 metagenome analyzer. The Euryarchaeota and Thaumarchaeota were the dominant representative phyla present within our dataset. In the Euryarchaeota phylum, Thermoplasmatales and Halobacteriaceae grouped the majority of the representative sequences of different samples. Supplementary Table 1: Primers used for amplification of the V3–V5 region of the archaeal 16S rRNA. Supplementary Table 2: Assessment of physico-chemical parameters, heavy metals and polyaromatic hydrocarbons (PAH) in Sundarbans sediments. Supplementary Table 3: Comparative percent detection of Euryarchaeota and Thaumarchaeota in Sundarbans. [file 968582.f1.zip › Supplementary Files/Table S2.xlsx]

## Sheet: Sheet1
TableS2. Assessment of physico-chemical parameters, heavy metals and polyaromatic hydrocarbons (PAH) in Sundarbans sediments
	Gadkhali_surface	Gadkhali_subsurface	Dhulibhasani_surface	Dhulibhasani_subsurface	Bonnie camp_surface	Bonnie camp_subsurface
Ni (g/Kg)	0.02688	0.02409	0.02415	0.0263	0.0303	0.0293
	0.03254	0.02844	0.02254	0.02541	0.03102	0.02805
	0.03146	0.02709	0.02103	0.02601	0.02989	0.02911
Cd (g/Kg)	0.00091	0.0009	0.00078	0.00074	0.00056	0.00053
	0.001	0.0011	0.00065	0.00073	0.0005	0.00052
	0.0012	0.0008	0.00063	0.00069	0.0006	0.00054
Cu (g/Kg)	0.02068	0.01682	0.01692	0.02019	0.02459	0.02426
	0.023	0.01853	0.01531	0.02189	0.02203	0.02106
	0.025	0.01901	0.01599	0.02014	0.02311	0.02257
Pb (g/Kg)	0.024	0.0209	0.02	0.0209	0.0271	0.0251
	0.02593	0.02106	0.01984	0.02104	0.02504	0.02357
	0.02889	0.02367	0.01859	0.02215	0.02406	0.02343
Zn (g/Kg)	0.0636	0.0465	0.0375	0.0597	0.0992	0.0992
	0.0761	0.0578	0.0219	0.04675	0.08921	0.08921
	0.0621	0.0498	0.02998	0.04989	0.07937	0.07937
Fe (g/Kg)	28.04	24.23	22.71	18.6	25.77	21.47
	32.04	26.89	21.94	20.48	27.52	20.98
	35.94	25.57	24.07	21.71	28.17	22.62
Ammonia (mg/g)	1125.17	1211.07	958.249	1021.55	1023.86	1077.4
	1462.02	1192.94	973.986	1230.71	1021.09	1320.95
	1510.02	1410.04	1080.48	1180.39	1202.05	1230.86
Silicate (mg/g)	1172.74	762.805	1187.67	782.39	1138.57	868.347
	1050.94	930.849	1380.33	1030.29	1439.04	1020.4
	1240.45	822.783	1299.94	980.982	1520.19	1120.58
Phosphate (mg/g)	340.408	335.64	344.624	344.352	307.808	320.96
	345.594	330.478	345.98	342.876	309.983	310.298
	339.93	338.482	348.85	345.99	308.493	312.49
Nitrite (mg/g)	5.355	10.54	2.04	8.755	16.49	12.835
	7.213	11.0289	5.389	9.289	18.2897	14.379
	8.281	9.9082	7.982	9.271	15.3789	13.289
Nitrate (mg/g)	115.678	120.278	129.39	120.29	112.47	115.478
	123.298	120.38	121.29	119	118.28	118.27
	112.388	117.289	112.39	118.29	117.28	119
Sulphate (mg/g)	108.723	120.365	159.459	158.213	137.86	124.67
	110.909	124.789	150.21	150.98	130.238	133.038
	114.289	125.379	152.389	153.29	133.013	139.583
Temperature ( ͦC)	31.3	32	30.4	30.1	31.3	31
	31	31	29.7	31.2	32.1	32.5
	32.2	32.5	30.1	30.9	32.8	32.5
pH	7.88	7.85	7.96	7.95	7.97	7.98
	7.85	7.8	7.96	7.94	7.89	7.99
	7.9	7.82	7.98	7.96	7.99	7.8
D.O. (mg/lit)	7.32	7.24	7.15	7.02	7.15	7.05
	7.25	7.2	7.32	7.12	7.25	7.1
	7.27	7.13	7.25	7.32	7.29	7.05
Saturation (%)	101.6	99	96.7	95	98.2	96
	102	100.02	97.23	97.43	99.89	99.9
	99.029	98.67	98.82	98.27	97.28	100.023
Salinity (PSU)	21.9	21	22.1	22.8	21.6	21.4
	21	21.4	21.8	22.5	21.5	21.8
	21.4	21.7	21.5	21.8	21.7	21
Total Nitrogen (N) mg/Lit	1.24	4.6	1.5	2.83	1.34	5.6
	1.22	5.2	1.5	2.56	1.37	5.98
	1.26	4.34	1.32	2.78	1.46	5.2
Total Carbon (TOC) mg/Lit	2.2	6.7	5.6	9.4	4.3	7.5
	1.78	6.2	5.34	10.32	4.36	7.9
	2.16	7.12	4.97	9.79	4.52	7.51
	Godkhali_surface	Godkhali_subsurface	Dhulibhasani_surface	Dhulibhasani_subsurface	Bonnie camp_surface	Bonnie camp_subsurface
Napthalene (ng/g)	317	753.21	54.37	101.37	218.98	369.75
	323.56	734.01	31.28	88.49	231.64	352.48
	341.086	723.9	36.47	94.36	243.78	382.21
Acenapthylene (ng/g)	102.12	224.76	5.3	17.18	25.37	79.48
	93.57	233.31	4.19	15.38	36.32	87.43
	83.28	219.27	4.02	13.83	38.49	89.39
Fluorene (ng/g)	8.3	20.27	0	0	0.096	0.228
	6.94	17.36	0	0	0.068	0.198
	9.89	19.04	0	0	0.089	0.167
Phenanthrene (ng/g)	0.13	0.26	0	0	0.01	0.05
	0.15	0.21	0	0	0.0098	0.02
	0.11	0.15	0	0	0.012	0.023
Fluoranthene (ng/g)	30.82	93.94	0	0	13.85	47.75
	35.37	86.39	0	0	17.04	41.79
	27.95	98.13	0	0	22.38	37.21
Acenapthene (ng/g)	1.89	3.25	0	0	0.039	0.21
	1.74	3.84	0	0	0.068	0.28
	1.69	2.99	0	0	0.041	0.198
Pyrene (ng/g)	3.28	10.27	0	0	0.59	2.36
	3.72	9.06	0	0	0.81	2.43
	3.94	11.29	0	0	0.73	2.08
